# Supplementary material for: Multidrug resistance-associated protein 4 is a bile transporter of Clonorchis sinensis simulated by in silico docking
Source: PubMed Central journal article supplement (PMC5697364; doi:10.1186/s13071-017-2523-8), 2017-11-21
Supplement: 13071_2017_2523_MOESM1_ESM.pdf [file 13071_2017_2523_MOESM1_ESM.pdf]

**Table S1.** Primer sets used to amplify CsMRP4 cDNA fragments by PCR.

| Purpose            | Targeted region | Forward/Reverse | Primer sequence (5'→3')           |
|--------------------|-----------------|-----------------|-----------------------------------|
| Sequence cloning   | CsMRP4-I        | F               | ATG TTCCTTCATTACGCATGGGT          |
|                    |                 | R               | CCATACTCCACACCATCTGATTTGA         |
|                    | CsMRP4-II       | F               | GTGGCAA ACTGGCACTATCAGCT          |
|                    |                 | R               | TCATAAATTTGAAAGCACGAAGCGAGTC      |
| Expression cloning | NBD1            | F               | GGATCCAATGTCTCGGCACGCTGGTTTG      |
|                    |                 | R               | GCATCAAGCTTCCTTCCTCCTCCATAATAATGA |
| Q-rt-PCR           |                 | F               | GAGCTACTGGCTGCTGATTCC             |
|                    |                 | R               | GGGACTCCTTGCCACAGATTC             |
