# Supplementary material for: Multidrug resistance-associated protein 4 is a bile transporter of Clonorchis sinensis simulated by in silico docking
Source: PubMed Central journal article supplement (PMC5697364; doi:10.1186/s13071-017-2523-8), 2017-11-21
Supplement: 13071_2017_2523_MOESM4_ESM.pdf [file 13071_2017_2523_MOESM4_ESM.pdf]

**Table S2.** Identities calculated between CsMRP4 and MRP/SUR/CFTR subfamily members.

|        | CsMRP4      | HsMRP4 | HsMRP5 | HsMRP8 | HsMRP9 | HsMRP1 | HsMRP3 | HsMRP2 | HsMRP6 | HsCFTR | HsSUR1 | HsSUR2 | CsMRP7 | HsMRP7 |
|--------|-------------|--------|--------|--------|--------|--------|--------|--------|--------|--------|--------|--------|--------|--------|
| CsMRP4 | -           |        |        |        |        |        |        |        |        |        |        |        |        |        |
| HsMRP4 | <b>39.0</b> | -      |        |        |        |        |        |        |        |        |        |        |        |        |
| HsMRP5 | 31.8        | 35.8   | -      |        |        |        |        |        |        |        |        |        |        |        |
| HsMRP8 | 30.1        | 34.0   | 40.5   | -      |        |        |        |        |        |        |        |        |        |        |
| HsMRP9 | 31.0        | 35.4   | 45.6   | 49.0   | -      |        |        |        |        |        |        |        |        |        |
| HsMRP1 | 33.2        | 37.7   | 35.6   | 31.8   | 34.2   | -      |        |        |        |        |        |        |        |        |
| HsMRP3 | 31.6        | 35.8   | 33.7   | 33.5   | 32.7   | 57.9   | -      |        |        |        |        |        |        |        |
| HsMRP2 | 31.2        | 37.6   | 35.5   | 31.1   | 32.7   | 49.0   | 47.9   | -      |        |        |        |        |        |        |
| HsMRP6 | 31.2        | 33.6   | 31.9   | 30.5   | 31.4   | 45.3   | 43.5   | 38.8   | -      |        |        |        |        |        |
| HsCFTR | 29.0        | 35.2   | 26.4   | 28.1   | 26.8   | 27.4   | 27.0   | 27.5   | 26.7   | -      |        |        |        |        |
| HsSUR1 | 30.5        | 32.6   | 31.2   | 28.4   | 29.6   | 33.7   | 32.9   | 31.7   | 31.1   | 25.5   | -      |        |        |        |
| HsSUR2 | 30.2        | 32.5   | 31.9   | 29.3   | 28.7   | 33.6   | 33.5   | 32.0   | 30.8   | 26.5   | 68.9   | -      |        |        |
| CsMRP7 | 29.6        | 31.4   | 27.3   | 26.0   | 28.2   | 30.6   | 30.5   | 29.3   | 29.7   | 25.2   | 26.7   | 26.9   | -      |        |
| HsMRP7 | 31.7        | 35.1   | 32.8   | 30.6   | 31.9   | 33.2   | 34.5   | 32.9   | 31.8   | 27.3   | 30.2   | 30.2   | 38.4   | -      |
